# Supplementary material for: Atmospheric NH 3 in urban Beijing: long-term variations and implications for secondary inorganic aerosol control
Source: Copernicus journal article supplement (doi:10.5194/egusphere-2024-375), 2024-04-11
Supplement: Supplementary file 1 [file egusphere-2024-375-supplement.pdf]

# Supporting Information

## Atmospheric NH<sub>3</sub> in urban Beijing: long-term variations and implication to secondary inorganic aerosol control

Ziru Lan<sup>1</sup>, Xiaoyi Zhang<sup>2</sup>, Weili Lin<sup>1</sup>, Xiaobin Xu<sup>2</sup>, Zhiqiang Ma<sup>3</sup>, Jun Jin<sup>1</sup>, Lingyan Wu<sup>2</sup>, Yangmei Zhang<sup>2</sup>

<sup>1</sup>*Key Laboratory of Ecology and Environment in Minority Areas, Minzu University of China, National Ethnic Affairs Commission, Beijing 100081, China*

<sup>2</sup>*Institute of Atmospheric Composition, Chinese Academy of Meteorological Science, Beijing 100081, China*

<sup>3</sup>*Institute of Urban Meteorology, China Meteorological Administration, Beijing 100089, China*

Correspondence to: Weili Lin([linwl@muc.edu.cn](mailto:linwl@muc.edu.cn))

This file includes:

Supplementary Figures S1-S11

Supplementary Tables S1-S3

SI Reference

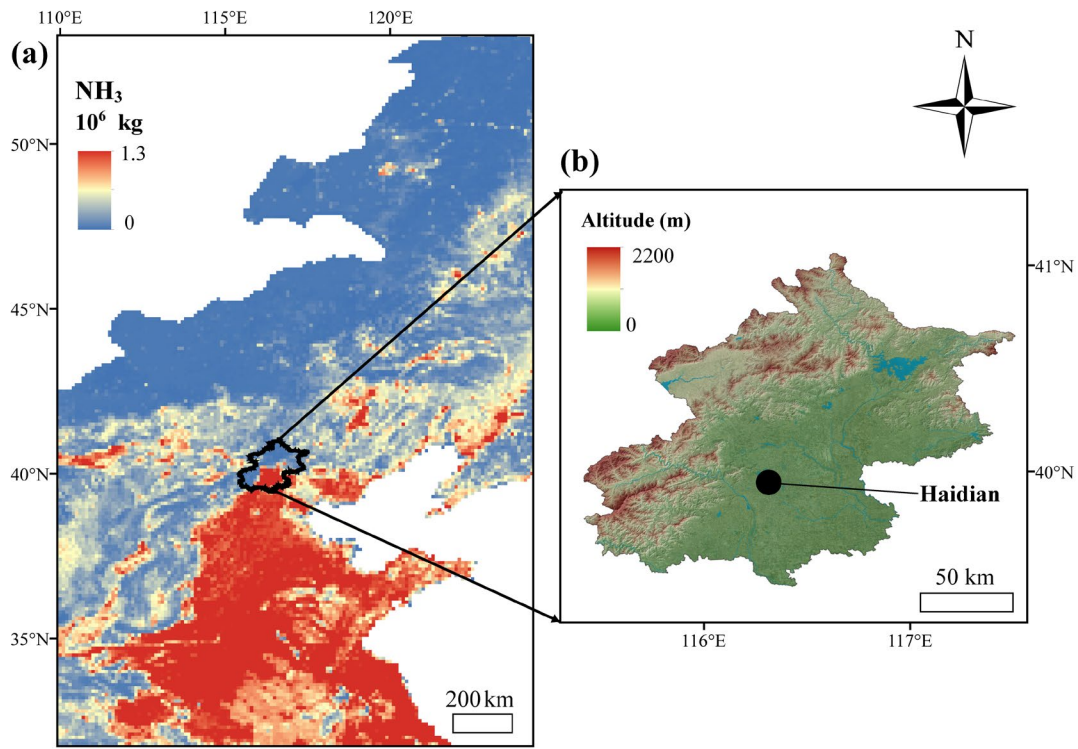

Figure S1. NH<sub>3</sub> emission in and around Beijing (a) and topographic map of Beijing (b).

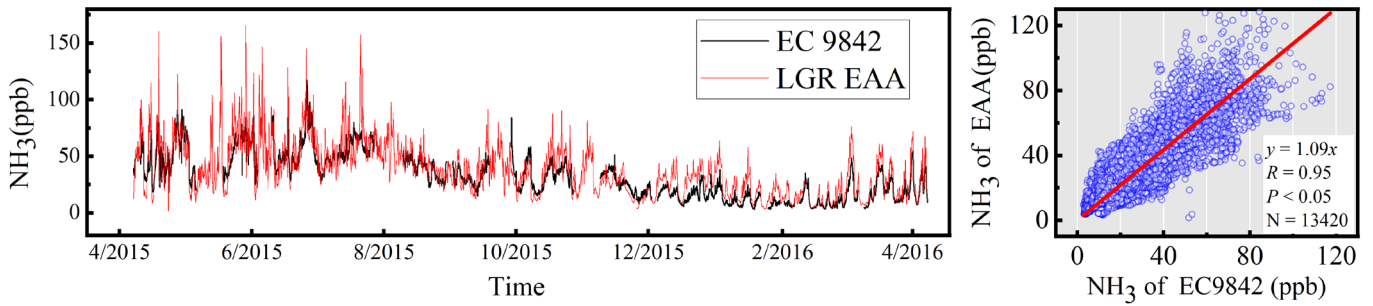

Figure S2. The result of parallel observation made by two analyzers.

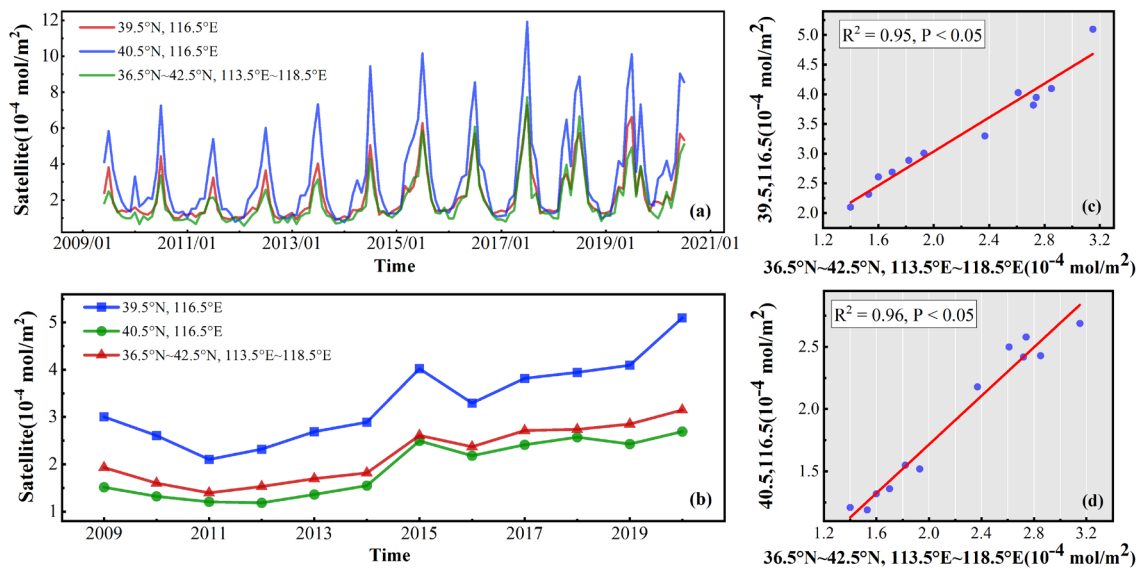

Figure S3. Monthly (a) and annual (b) variations and correlations (c) (d) between satellite observations during the observation period at the grid points around the monitoring stations (39.5°N, 116.5°E and 40.5°N, 116.5°E) and the average observations in the region selected for the present study (36.5°N~42.5°N, 113.5°E~118.5°E).

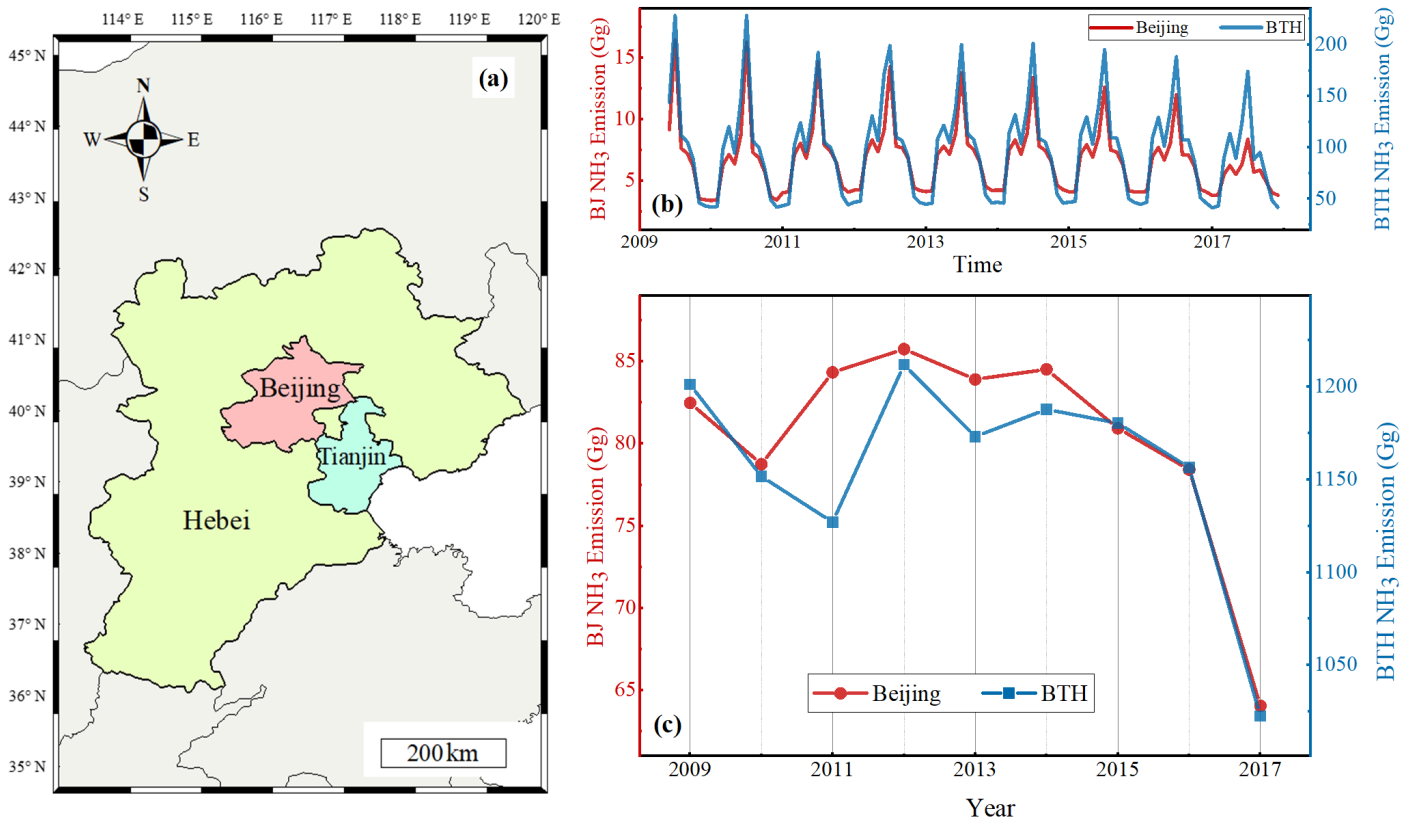

Figure S4. Comparison of NH<sub>3</sub> emissions in Beijing (BJ) with those in the Beijing-Tianjin-Hebei Region (BTH) during the observation period. (a) Geographic location of BTH, (b) Monthly emissions of atmospheric NH<sub>3</sub> in Beijing and BTH from 2009 to 2017, (c) Annual emissions of atmospheric NH<sub>3</sub> in Beijing and BTH from 2009 to 2017.

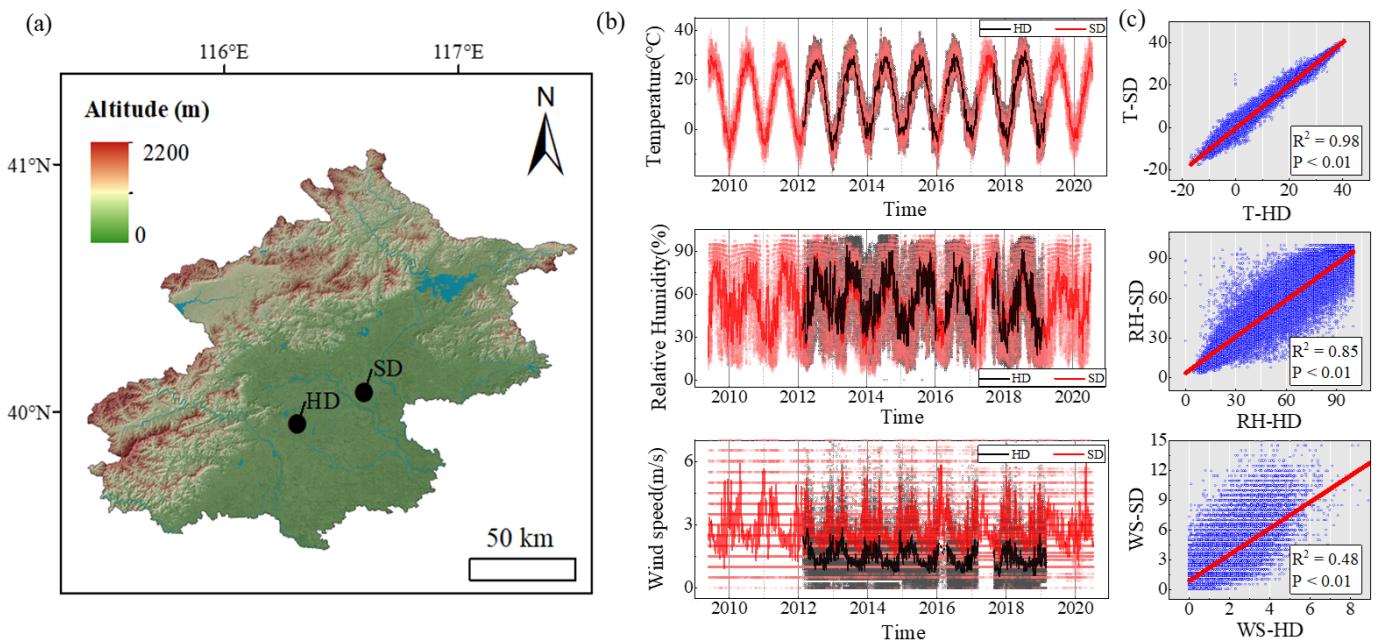

Figure S5. Comparison of meteorological elements between the meteorological station at the capital airport (SD) and the Haidian meteorological station (HD). (a) Geographic locations of SD and HD; (b) Time series plots of temperature, relative humidity, and wind speed for SD and HD, with hollow points as hourly averages and solid lines as two-week smoothed curves, (c) Correlation of temperature, relative humidity, and wind speed between SD and HD.

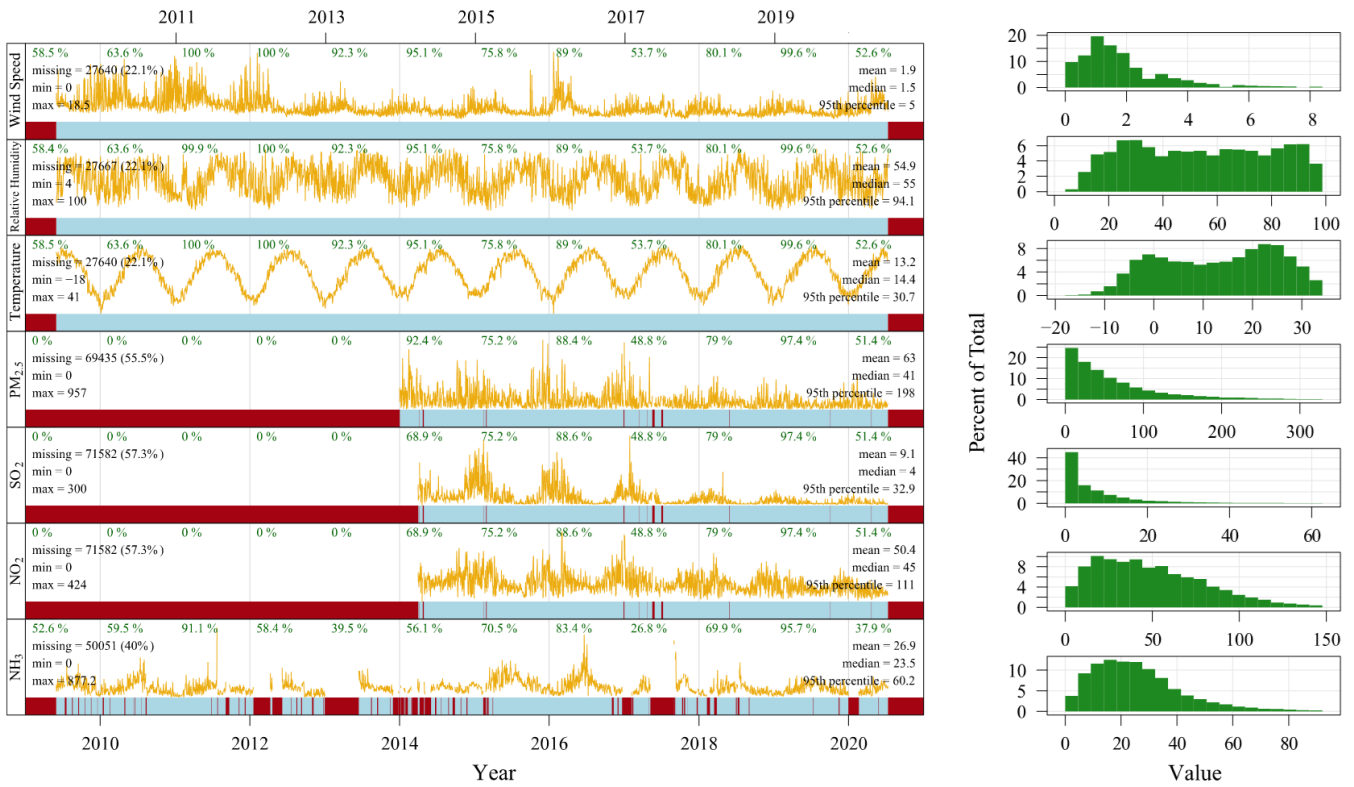

Figure S6. Time series, frequency distributions, and statistical analysis of NH<sub>3</sub> mixing ratios (ppb), selected pollutant concentrations (µg/m<sup>3</sup>), and selected meteorological data (Wind speed: m/s, Relative humidity: %, Temperature: °C) during the observation period (mean, median/95% quartile, minimum/large values, and amount and percentage of missing value data).

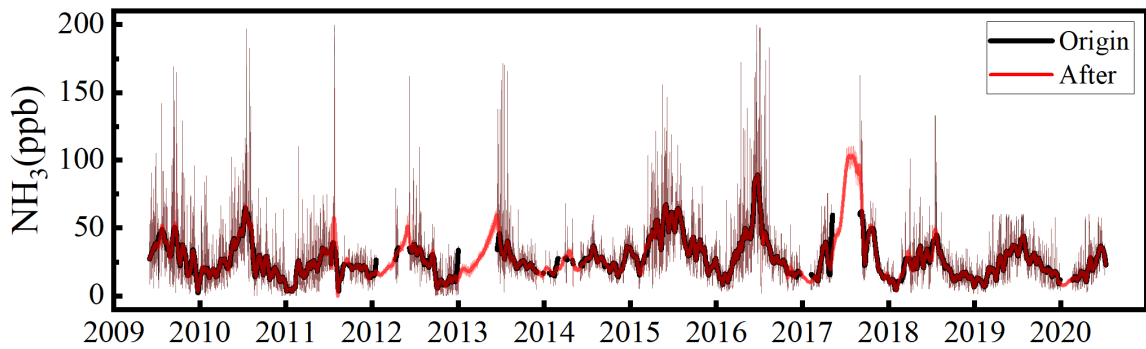

Figure S7. Raw data on NH<sub>3</sub> mixing ratios during the observation period and data with missing values filled in after Random Forest Model calculations.



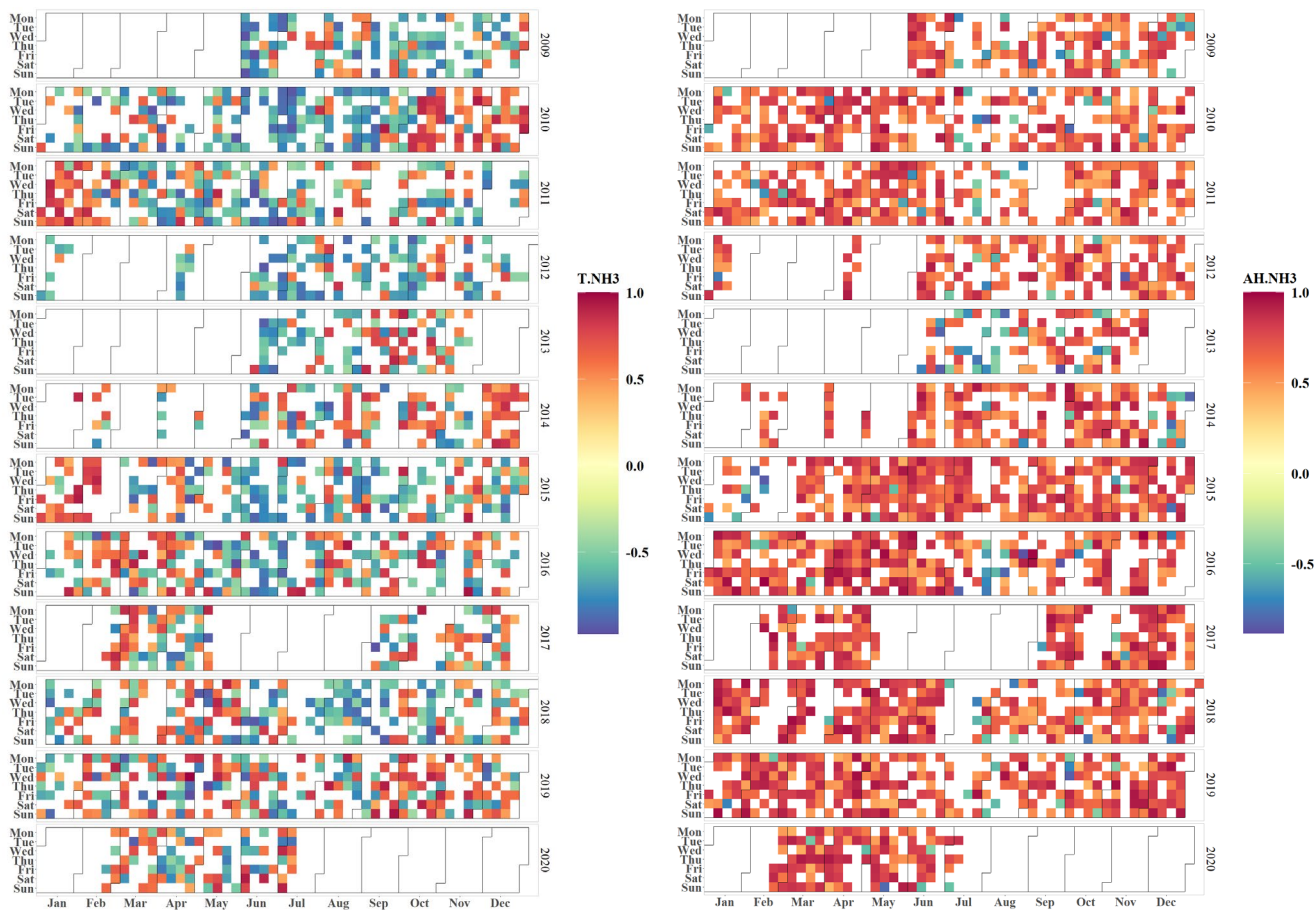

Figure S8. Correlation between daily temperature and  $\text{NH}_3$  mixing ratio (left) and between absolute humidity and  $\text{NH}_3$  concentration (right) for the observation period.

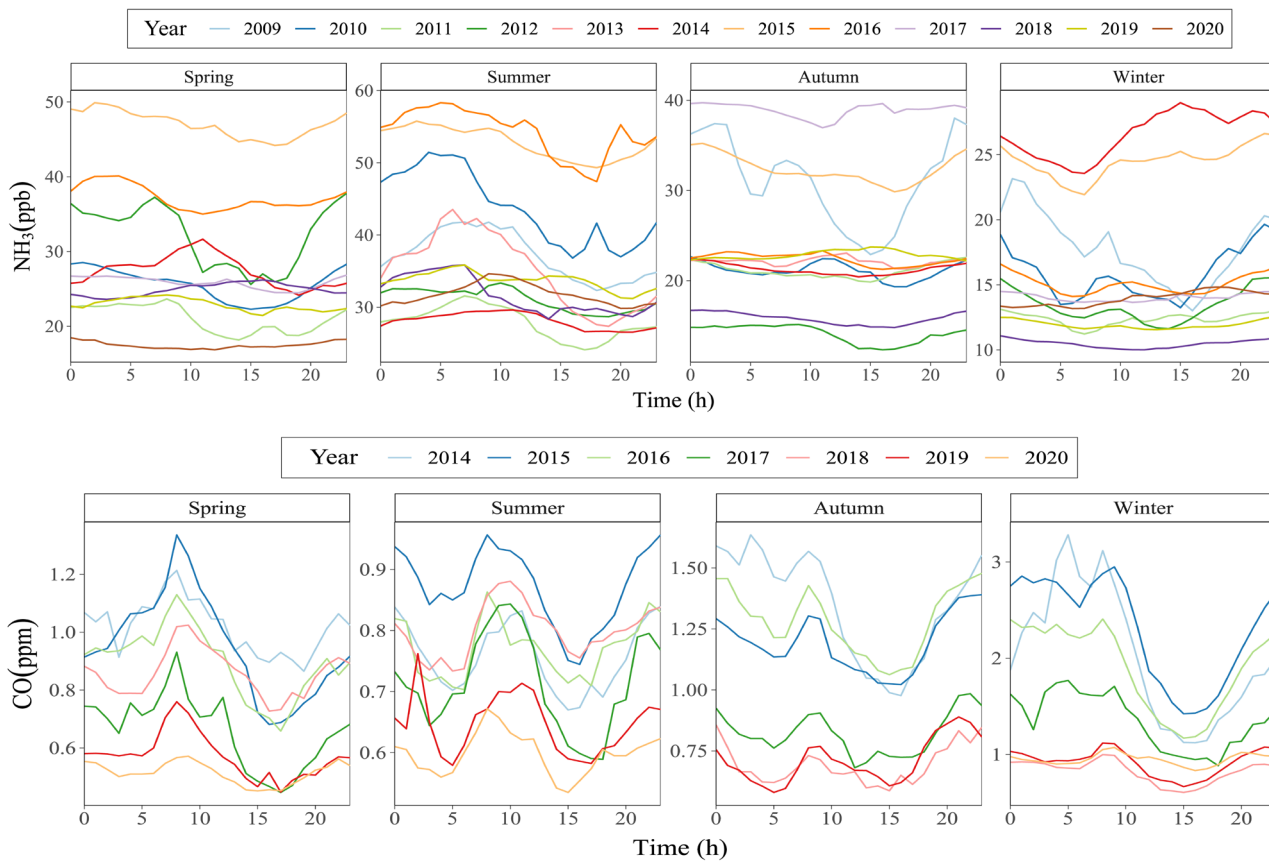

Figure S9. Characteristics of daily variations in  $\text{NH}_3$  and CO in different years and seasons during the observation period.

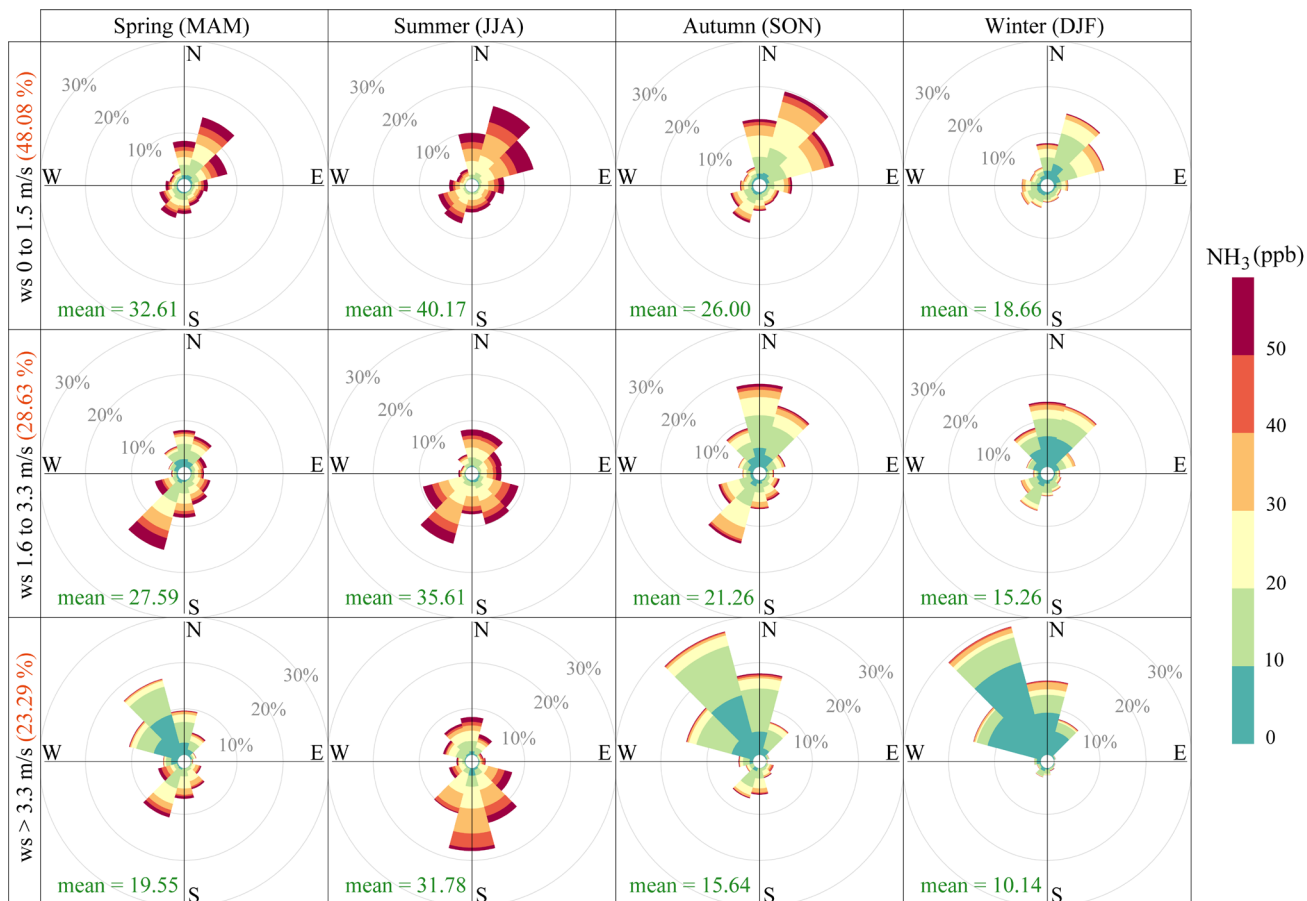

Figure S10. Pollution rose diagram of Beijing for various wind speeds in various seasons.

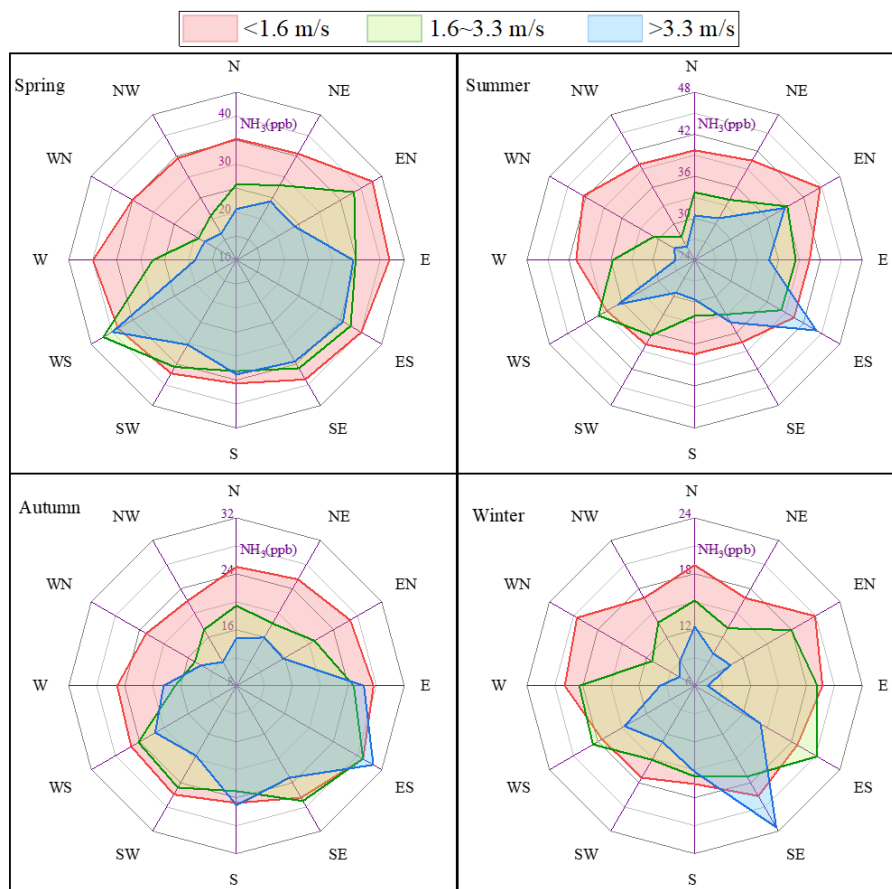

Figure S11. Mean mixing ratios of  $\text{NH}_3$  in different wind directions under different wind speed conditions.

Table S1. Comparison of surface NH<sub>3</sub> mixing ratios in urban areas with monitoring results from this study (ppb).

| Period          | Location         | Method                                                                              | Result | This study | Reference                                |
|-----------------|------------------|-------------------------------------------------------------------------------------|--------|------------|------------------------------------------|
| 2009/6~2020/7   | Beijing, China   | EC9842 NO <sub>x</sub> /NH <sub>3</sub> analyzer & LGR EAA NH <sub>3</sub> analyzer | 26.62  | -          | This study                               |
| 2008/2~2008/12  | Beijing, China   | Ogawa passive samplers                                                              | 15.3   | -          | Meng et al. (2011) <sup>1</sup>          |
| 2009            |                  |                                                                                     | 19.5   | -          |                                          |
| 2010/1~2010/7   |                  |                                                                                     | 21.0   | 30.50      |                                          |
| 2013/11~2013/12 | Beijing, China   | 17i ammonia analyzer                                                                | 25.30  | 12.23      | Zhao et al. (2016) <sup>2</sup>          |
| 2016/11~2016/12 | Beijing, China   | LGR NH <sub>3</sub> analyzer (DTL-100)                                              | 16.50  | 15.96      | Wang et al. (2019) <sup>3</sup>          |
| 2016/4~2016/5   | Beijing, China   | MARGA online monitor                                                                | 26.58  | 41.89      | Su et al. (2021) <sup>4</sup>            |
| 2017/10~2017/11 |                  |                                                                                     | 21.04  | 34.22      |                                          |
| 2017/12~2018/2  |                  |                                                                                     | 5.28   | 11.55      |                                          |
| 2017/9~2018/8   | Beijing, China   | LGR NH <sub>3</sub> analyzer (907)                                                  | 24.8   | 27.00      | Pu et al. (2020) <sup>5</sup>            |
| 2019/3~2020/2   | Beijing, China   | Picarro laser spectrometer (G2103)                                                  | 22.8   | 24.85      | Gu et al. (2022) <sup>6</sup>            |
| 2020/5~2021/6   | Beijing, China   | Picarro laser spectrometer (G2103)                                                  | 23.1   | 24.97      | Sun et al. (2023) <sup>7</sup>           |
| 2020/9~2021/8   | Beijing, China   | Picarro laser spectrometer (G2103)                                                  | 20.9   | -          | Gu et al. (2022) <sup>8</sup>            |
| 2015/9~2016/9   | Beijing, China   | Diffusive samplers                                                                  | 19.0   | 34.28      | Pan et al. (2018) <sup>9</sup>           |
|                 | Tianjin, China   |                                                                                     | 15.7   |            |                                          |
|                 | Baoding, China   |                                                                                     | 21.3   |            |                                          |
|                 | Xiamen, China    |                                                                                     | 7.2    |            |                                          |
|                 | Guangzhou, China |                                                                                     | 8.1    |            |                                          |
|                 | Nanjing, China   |                                                                                     | 15.0   |            |                                          |
|                 | Guizhou          |                                                                                     | 5.4    |            |                                          |
| 2006/4~2007/4   | Xi'an, China     | Ogawa passive samplers                                                              | 17.93  | -          | Cao et al. (2009) <sup>10</sup>          |
| 2014/4~2015/4   | Shanghai, China  | MARGA online monitor                                                                | 7.70   | 29.53      | Chang et al. (2016) <sup>11</sup>        |
| 2014/5~2015/6   | Shanghai, China  | Ogawa passive samplers                                                              | 7.80   | 33.82      | Chang et al. (2019) <sup>12</sup>        |
| 2017/4~2018/3   | Chengdu, China   | Ion Chromatography (Dionex ICS-600)                                                 | 13.48  | 25.85      | Huang et al. (2021) <sup>13</sup>        |
| 2001/5~2002/3   | Rome, Italy      | Annular diffusion denuders                                                          | 5.1    | -          | Perrino et al. (2002) <sup>14</sup>      |
| 2008/9~2009/8   | Kobe, Japan      | Passive sampler                                                                     | 2.22   | -          | Nguyen et al. (2021) <sup>15</sup>       |
| 2010/3~2011/3   | Toronto, Canada  | Passive sampler                                                                     | 2.74   | 24.55      | Zbieranowski et al. (2012) <sup>16</sup> |

|                |                     |                                          |       |       |                                       |
|----------------|---------------------|------------------------------------------|-------|-------|---------------------------------------|
| 2010/9~2011/8  | Seoul, South Korea  | Picarro laser spectrometer (G1103)       | 12.30 | 19.81 | Phan et al. (2013) <sup>17</sup>      |
| 2012/10~2013/9 | Delhi, India        | Handy sampler (Envirotech model APM 821) | 56.2  | 22.24 | Singh et al. (2014) <sup>18</sup>     |
| 2013/1~2014/12 | Delhi, India        | AC32M-CNH3 analyzer                      | 21.2  | 29.30 | Kotnala et al. (2020) <sup>19</sup>   |
| 2013           | Delhi, India        | Serinus 44 ammonia analyzer              | 55.6  | 29.30 | Saraswati et al. (2019) <sup>20</sup> |
| 2014           |                     |                                          | 52.4  | 25.29 |                                       |
| 2015           |                     |                                          | 52.2  | 38.80 |                                       |
| 2016/4~2017/10 | Rochester, USA      | Annular diffusion denuders               | 2.84  | 35.22 | Zhou et al. (2019) <sup>21</sup>      |
| 2016/6~2017/10 | New York City, USA  |                                          | 3.22  | 33.85 |                                       |
| 2019/5~2020/4  | Jeonju, South Korea | Picarro laser spectrometer (G2103)       | 10.50 | 23.50 | Park et al. (2021) <sup>22</sup>      |
| 2019/12~2021/9 | Reims, France       | Picarro laser spectrometer (G2103)       | 6.30  | -     | Chatain et al. (2022) <sup>23</sup>   |

Table S2. The proportion of mass concentration of each component of SNA in Beijing urban area (%)

| Year | Season | SO <sub>4</sub> <sup>2-</sup> | NO <sub>3</sub> <sup>-</sup> | NH <sub>4</sub> <sup>+</sup> |
|------|--------|-------------------------------|------------------------------|------------------------------|
| 2019 | Spring | 27.41                         | 49.82                        | 23.78                        |
| 2009 | Summer | 55.14                         | 26.47                        | 18.39                        |
| 2009 | Autumn | 67.03                         | 19.17                        | 13.80                        |
| 2018 | Autumn | 24.91                         | 52.07                        | 24.02                        |
| 2016 | Winter | 32.31                         | 42.38                        | 25.30                        |
| 2019 | Winter | 25.66                         | 48.36                        | 26.98                        |

Table S3. Sensitivity analysis of SNA to changes in precursor concentration.

| Simulated situation | Spring                        |                              |                              |       | Summer                        |                              |                              |       |
|---------------------|-------------------------------|------------------------------|------------------------------|-------|-------------------------------|------------------------------|------------------------------|-------|
|                     | SO <sub>4</sub> <sup>2-</sup> | NO <sub>3</sub> <sup>-</sup> | NH <sub>4</sub> <sup>+</sup> | SNA   | SO <sub>4</sub> <sup>2-</sup> | NO <sub>3</sub> <sup>-</sup> | NH <sub>4</sub> <sup>+</sup> | SNA   |
| +0.2TS              | 0.20                          | 0.04                         | 0.36                         | 0.21  | 0.20                          | 0.03                         | 0.49                         | 0.12  |
| -0.2TS              | -0.20                         | 0.25                         | -0.29                        | -0.10 | -0.20                         | -0.02                        | -0.33                        | -0.19 |
| +0.2TN              | 0.00                          | 0.26                         | 0.23                         | 0.10  | 0.00                          | 0.19                         | 0.02                         | 0.01  |
| -0.2TN              | 0.00                          | -0.22                        | -0.21                        | -0.10 | 0.00                          | -0.19                        | -0.01                        | -0.02 |
| +0.2TA              | 0.00                          | 0.03                         | 0.05                         | 0.01  | 0.00                          | 0.09                         | 0.02                         | 0.00  |
| -0.2TA              | 0.00                          | -0.04                        | -0.06                        | -0.01 | 0.00                          | -0.10                        | -0.02                        | -0.01 |
| Simulated situation | Autumn                        |                              |                              |       | Winter                        |                              |                              |       |
|                     | SO <sub>4</sub> <sup>2-</sup> | NO <sub>3</sub> <sup>-</sup> | NH <sub>4</sub> <sup>+</sup> | SNA   | SO <sub>4</sub> <sup>2-</sup> | NO <sub>3</sub> <sup>-</sup> | NH <sub>4</sub> <sup>+</sup> | SNA   |
| +0.2TS              | 0.20                          | 0.01                         | 0.24                         | 0.09  | 0.20                          | -0.00                        | 0.15                         | 0.08  |
| -0.2TS              | -0.20                         | -0.00                        | -0.06                        | -0.10 | -0.20                         | -0.00                        | -0.18                        | -0.09 |
| +0.2TN              | 0.00                          | 0.20                         | 0.55                         | 0.12  | 0.00                          | 0.20                         | 0.14                         | 0.13  |
| -0.2TN              | 0.00                          | -0.20                        | -0.17                        | -0.12 | 0.00                          | -0.20                        | -0.14                        | -0.13 |
| +0.2TA              | 0.00                          | 0.00                         | 0.01                         | 0.00  | -0.00                         | 0.00                         | 0.01                         | 0.00  |
| -0.2TA              | 0.00                          | -0.01                        | -0.02                        | -0.00 | 0.00                          | -0.00                        | -0.01                        | -0.00 |



## Reference

- (1) Meng, Z. Y.; Lin, W. L.; Jiang, X. M.; Yan, P.; Wang, Y.; Zhang, Y. M.; Jia, X. F.; Yu, X. L. Characteristics of Atmospheric Ammonia over Beijing, China. *Atmos Chem Phys* **2011**, *11* (12), 6139–6151. <https://doi.org/10.5194/acp-11-6139-2011>.
- (2) Zhao, M.; Wang, S.; Tan, J.; Hua, Y.; Wu, D.; Hao, J. Variation of Urban Atmospheric Ammonia Pollution and Its Relation with PM<sub>2.5</sub> Chemical Property in Winter of Beijing, China. *Aerosol Air Qual Res* **2016**, *16* (6), 1390–1402. <https://doi.org/10.4209/aaqr.2015.12.0699>.
- (3) Wang, Q.; Zhang, Q.; Ma, Z.; Ge, B.; Xie, C.; Zhou, W.; Zhao, J.; Xu, W.; Du, W.; Fu, P.; Lee, J.; Nemitz, E.; Cowan, N.; Mullinger, N.; Cheng, X.; Zhou, L.; Yue, S.; Wang, Z.; Sun, Y. Temporal Characteristics and Vertical Distribution of Atmospheric Ammonia and Ammonium in Winter in Beijing. *Science of The Total Environment* **2019**, *681*, 226–234. <https://doi.org/10.1016/j.scitotenv.2019.05.137>.
- (4) Su, J.; Zhao, P.; Ding, J.; Du, X.; Dou, Y. Insights into Measurements of Water-Soluble Ions in PM<sub>2.5</sub> and Their Gaseous Precursors in Beijing. *Journal of Environmental Sciences* **2021**, *102*, 123–137. <https://doi.org/10.1016/j.jes.2020.08.031>.
- (5) Pu, W.; Ma, Z.; Collett Jr, J. L.; Guo, H.; Lin, W.; Cheng, Y.; Quan, W.; Li, Y.; Dong, F.; He, D. Regional Transport and Urban Emissions Are Important Ammonia Contributors in Beijing, China. *Environ Pollut* **2020**, *265*, 115062. <https://doi.org/10.1016/j.envpol.2020.115062>.
- (6) Gu, M.; Pan, Y.; Walters, W. W.; Sun, Q.; Song, L.; Wang, Y.; Xue, Y.; Fang, Y. Vehicular Emissions Enhanced Ammonia Concentrations in Winter Mornings: Insights from Diurnal Nitrogen Isotopic Signatures. *Environ Sci Technol* **2022**, *56* (3), 1578–1585. <https://doi.org/10.1021/acs.est.1c05884>.
- (7) Sun, Q.; Gu, M.; Wu, D.; Yang, T.; Wang, H.; Pan, Y. Concurrent Measurements of Atmospheric Ammonia Concentrations in the Megacities of Beijing and Shanghai by Using Cavity Ring-down Spectroscopy. *Atmos Environ* **2023**, *307*, 119848. <https://doi.org/10.1016/j.atmosenv.2023.119848>.
- (8) Gu, M.; Pan, Y.; Sun, Q.; Walters, W. W.; Song, L.; Fang, Y. Is Fertilization the Dominant Source of Ammonia in the Urban Atmosphere? *Science of The Total Environment* **2022**, *838*, 155890. <https://doi.org/10.1016/j.scitotenv.2022.155890>.
- (9) Pan, Y.; Tian, S.; Zhao, Y.; Zhang, L.; Zhu, X.; Gao, J.; Huang, W.; Zhou, Y.; Song, Y.; Zhang, Q.; Wang, Y. Identifying Ammonia Hotspots in China Using a National Observation Network. *Environ Sci Technol* **2018**, *52* (7), 3926–3934. <https://doi.org/10.1021/acs.est.7b05235>.
- (10) Cao, J.-J.; Zhang, T.; Chow, J. C.; Watson, J. G.; Wu, F.; Li, H. Characterization of Atmospheric Ammonia over Xi'an, China. *Aerosol Air Qual Res* **2009**, *9* (2), 277–289. <https://doi.org/10.4209/aaqr.2008.10.0043>.
- (11) Chang, Y.; Zou, Z.; Deng, C.; Huang, K.; Collett, J. L.; Lin, J.; Zhuang, G. The Importance of Vehicle Emissions as a Source of Atmospheric Ammonia in the Megacity of Shanghai. *Atmos Chem Phys* **2016**, *16* (5), 3577–3594. <https://doi.org/10.5194/acp-16-3577-2016>.
- (12) Chang, Y.; Zou, Z.; Zhang, Y.; Deng, C.; Hu, J.; Shi, Z.; Dore, A. J.; Collett, J. L. Assessing Contributions of Agricultural and Nonagricultural Emissions to Atmospheric Ammonia in a Chinese Megacity. *Environ Sci Technol* **2019**, *53* (4), 1822–1833. <https://doi.org/10.1021/acs.est.8b05984>.
- (13) Huang, X.; Zhang, J.; Zhang, W.; Tang, G.; Wang, Y. Atmospheric Ammonia and Its Effect on PM<sub>2.5</sub> Pollution in Urban Chengdu, Sichuan Basin, China. *Environ Pollut* **2021**, *291*, 118195. <https://doi.org/10.1016/j.envpol.2021.118195>.
- (14) Perrino, C.; Catrambone, M.; Di Menno Di Bucchianico, A.; Allegrini, I. Gaseous Ammonia in the Urban Area of Rome, Italy and Its Relationship with Traffic Emissions. *Atmos Environ* **2002**, *36* (34), 5385–5394. [https://doi.org/10.1016/s1352-2310\(02\)00469-7](https://doi.org/10.1016/s1352-2310(02)00469-7).
- (15) Nguyen, D. V.; Sato, H.; Hamada, H.; Yamaguchi, S.; Hiraki, T.; Nakatsubo, R.; Murano, K.; Aikawa, M. Symbolic Seasonal Variation Newly Found in Atmospheric Ammonia Concentration in Urban Area of Japan. *Atmos Environ* **2021**, *244*, 117943. <https://doi.org/10.1016/j.atmosenv.2020.117943>.

- (16) Zbieranowski, A. L.; Aherne, J. Ambient Concentrations of Atmospheric Ammonia, Nitrogen Dioxide and Nitric Acid across a Rural–Urban–Agricultural Transect in Southern Ontario, Canada. *Atmos Environ* **2012**, *62*, 481–491. <https://doi.org/10.1016/j.atmosenv.2012.08.040>.
- (17) Phan, N.-T.; Kim, K.-H.; Shon, Z.-H.; Jeon, E.-C.; Jung, K.; Kim, N.-J. Analysis of Ammonia Variation in the Urban Atmosphere. *Atmos Environ* **2013**, *65*, 177–185. <https://doi.org/10.1016/j.atmosenv.2012.10.049>.
- (18) Singh, S.; Kulshrestha, U. C. Rural versus Urban Gaseous Inorganic Reactive Nitrogen in the Indo-Gangetic Plains (IGP) of India. *Environ Res Lett* **2014**, *9* (12), 125004. <https://doi.org/10.1088/1748-9326/9/12/125004>.
- (19) Kotnala, G.; Sharma, S. K.; Mandal, T. K. Influence of Vehicular Emissions (NO, NO<sub>2</sub>, CO and NMHCs) on the Mixing Ratio of Atmospheric Ammonia (NH<sub>3</sub>) in Delhi, India. *Arch Environ Con Tox* **2019**, *78* (1), 79–85. <https://doi.org/10.1007/s00244-019-00689-8>.
- (20) Saraswati; George, M. P.; Sharma, S. K.; Mandal, T. K.; Kotnala, R. K. Simultaneous Measurements of Ambient NH<sub>3</sub> and Its Relationship with Other Trace Gases, PM<sub>2.5</sub> and Meteorological Parameters over Delhi, India. *MAPAN* **2019**, *34* (1), 55–69. <https://doi.org/10.1007/s12647-018-0286-0>.
- (21) Zhou, C.; Zhou, H.; Holsen, T. M.; Hopke, P. K.; Edgerton, E. S.; Schwab, J. J. Ambient Ammonia Concentrations Across New York State. *J Geophys Res-atmos* **2019**, *124* (14), 8287–8302. <https://doi.org/10.1029/2019jd030380>.
- (22) Park, J.; Kim, E.; Oh, S.; Kim, H.; Kim, S.; Kim, Y. P.; Song, M. Contributions of Ammonia to High Concentrations of PM<sub>2.5</sub> in an Urban Area. *Atmosphere-basel* **2021**, *12* (12), 1676. <https://doi.org/10.3390/atmos12121676>.
- (23) Chatain, M.; Chretien, E.; Crunaire, S.; Jantzen, E. Road Traffic and Its Influence on Urban Ammonia Concentrations (France). *Atmosphere-basel* **2022**, *13* (7), 1032. <https://doi.org/10.3390/atmos13071032>.
